# Supplementary material for: Genes essential for embryonic stem cells are associated with neurodevelopmental disorders
Source: HighWire-hosted journal article supplement (doi:10.1101/gr.250019.119), 2019-10-24
Supplement: Supplemental_Table_S5.xlsx [file Supplemental_Table_S5.xlsx]

## Sheet: all_used_terms
Table S5	Mouse phenotype terms which were used in the comparison with mESCs essential genes
ID	Term	Definition
MP:0001255	decreased body height	decreased shoulder to floor distance compared to controls
MP:0001258	decreased body length	decreased measure of the head and trunk (head, thorax and abdomen) in the rostral-caudal direction
MP:0001262	decreased body weight	lower than normal average weight
MP:0001265	decreased body size	smaller than average body weight, height and/or length of an organism compared to controls
MP:0001698	decreased embryo size	smaller proportions of an embryo compared to littermates or other controls (sensu Mus: up to E14, or the completion of organogenesis)
MP:0001731	abnormal postnatal growth	anomaly in reaching a developmental stage or stages after birth
MP:0001732	postnatal growth retardation	slow or limited development after birth
MP:0002058	neonatal lethality	death within the neonatal period after birth (Mus: P0)
MP:0002080	prenatal lethality	death anytime between fertilization and birth (Mus: approximately E18 5)
MP:0002081	perinatal lethality	death anytime within the perinatal period (Mus: E18 5 through postnatal day 1)
MP:0002082	postnatal lethality	premature death anytime between the neonatal period and weaning age (Mus: P1 to approximately 3 weeks of age)
MP:0002083	premature death	death after weaning age, but before the normal life span (Mus: after 3 weeks of age)
MP:0003984	embryonic growth retardation	slow or limited development during the embryonic period (sensu Mus: up to E14, or the completion of organogenesis)
MP:0004200	decreased fetal size	smaller proportions of a fetus compared to littermates (sensu Mus: from E14 through birth)
MP:0004201	fetal growth retardation	slow or limited development during the fetal period (sensu Mus: from E14 through birth)
MP:0006204	embryonic lethality before implantation	death anytime between fertilization and implantation (Mus: E0 to less than E4 5)
MP:0006205	embryonic lethality between implantation and somite formation	death anytime between the point of implantation and somite formation (Mus: E4 5 to less than E8)
MP:0006206	embryonic lethality between somite formation and embryo turning	death anytime between somite formation and the initiation of embryo turning (Mus: E8 to less than E9)
MP:0006207	embryonic lethality during organogenesis	death anytime between embryo turning and the completion of organogenesis (Mus: E9-9 5 to less than E14)
MP:0006208	lethality throughout fetal growth and development	death anytime between the completion of organogenesis and birth (Mus: E14 to approximately E18 5)
MP:0008028	pregnancy-related premature death	death occurring before the normal life span of an organism, occurring during pregnancy, parturition or lactation
MP:0008489	slow postnatal weight gain	the weight gain over a span of postnatal developmental time is slower than controls, with or without ever attaining a similar weight to controls as adults
MP:0008527	embryonic lethality at implantation	death due to failure of implantation (Mus: E4 5)
MP:0008569	lethality at weaning	premature death at weaning age, often due to the inability to make the transition to solid food
MP:0008762	embryonic lethality	death of an animal within the embryonic period prior to organogenesis (Mus: prior to E14)
MP:0008770	decreased survivor rate	a smaller percentage of organisms than expected survive to adulthood and have a lifespan similar to controls
MP:0008974	proportional dwarf	abnormally undersized with both limbs and trunk symmetrically shorter; usually due to chemical, endocrine, nutritional or nonosseous influences
MP:0009429	decreased embryo weight	reduced weight of an embryo compared to littermates or other controls (sensu Mus: up to E14, or the completion of organogenesis)
MP:0009431	decreased fetal weight	reduced weight of a fetus compared to controls (sensu Mus: from E14 through birth)
MP:0009850	embryonic lethality between implantation and placentation	death anytime between the point of implantation and the initiation of placentation (Mus: E4 5 to less than E9)
MP:0010769	abnormal survival	deviation from the expected viability or life span of an organism
MP:0010770	preweaning lethality	death anytime between fertilization and weaning age (Mus: approximately 3-4 weeks of age)
MP:0010831	lethality, incomplete penetrance	the appearance of lower than Mendelian ratios of offspring of a given genotype due to death of some, but not all of the organisms
MP:0010832	lethality during fetal growth through weaning	death anytime between the completion of organogenesis and weaning age (Mus: E14 to approximately 3 weeks of age)
MP:0010865	prenatal growth retardation	slow or limited development during the prenatal period
MP:0011083	lethality at weaning, complete penetrance	premature death at weaning age of all organisms of a given genotype in a population, often due to the inability to make the transition to solid food
MP:0011084	lethality at weaning, incomplete penetrance	the appearance of lower than Mendelian ratios of organisms of a given genotype due to death of some, but not all of the organisms at weaning age
MP:0011085	postnatal lethality, complete penetrance	premature death anytime between the neonatal period and weaning age of all organisms of a given genotype in a population (Mus: P1 to approximately 3 weeks of age)
MP:0011086	postnatal lethality, incomplete penetrance	the appearance of lower than Mendelian ratios of organisms of a given genotype due to death of some, but not all of the organisms anytime between the neonatal period and weaning age (Mus: P1 to approximately 3 weeks of age)
MP:0011087	neonatal lethality, complete penetrance	death of all organisms of a given genotype in a population within the neonatal period after birth (Mus: P0)
MP:0011088	neonatal lethality, incomplete penetrance	the appearance of lower than Mendelian ratios of organisms of a given genotype due to death of some, but not all of the organisms within the neonatal period after birth (Mus: P0)
MP:0011089	perinatal lethality, complete penetrance	death of all organisms of a given genotype in a population within the perinatal period (Mus: E18 5 through postnatal day 1)
MP:0011090	perinatal lethality, incomplete penetrance	the appearance of lower than Mendelian ratios of organisms of a given genotype due to death of some, but not all of the organisms within the perinatal period (Mus: E18 5 through postnatal day 1)
MP:0011091	prenatal lethality, complete penetrance	death of all organisms of a given genotype in a population between fertilization and birth (Mus: approximately E18 5)
MP:0011092	embryonic lethality, complete penetrance	death of all organisms of a given genotype in a population within the embryonic period prior to organogenesis (Mus: prior to E14)
MP:0011093	embryonic lethality at implantation, complete penetrance	death of all organisms of a given genotype in a population at the point of implantation (Mus: E4 5)
MP:0011094	embryonic lethality before implantation, complete penetrance	death of all organisms of a given genotype in a population between fertilization and implantation (Mus: E0 to less than E4 5)
MP:0011095	embryonic lethality between implantation and placentation, complete penetrance	death of all organisms of a given genotype in a population between the point of implantation and the initiation of placentation (Mus: E4 5 to less than E9)
MP:0011096	embryonic lethality between implantation and somite formation, complete penetrance	death of all organisms of a given genotype in a population between the point of implantation and somite formation (Mus: E4 5 to less than E8)
MP:0011097	embryonic lethality between somite formation and embryo turning, complete penetrance	death of all organisms of a given genotype in a population between somite formation and the initiation of embryo turning (Mus: E8 to less than E9)
MP:0011098	embryonic lethality during organogenesis, complete penetrance	death of all organisms of a given genotype in a population between embryo turning and the completion of organogenesis (Mus: E9-9 5 to less than E14)
MP:0011099	lethality throughout fetal growth and development, complete penetrance	death of all organisms of a given genotype in a population between the completion of organogenesis and birth (Mus: E14 to approximately E18 5)
MP:0011100	preweaning lethality, complete penetrance	death of all organisms of a given genotype in a population between fertilization and weaning age (Mus: approximately 3-4 weeks of age)
MP:0011101	prenatal lethality, incomplete penetrance	the appearance of lower than Mendelian ratios of organisms of a given genotype due to death of some, but not all of the organisms between fertilization and birth (Mus: approximately E18 5)
MP:0011102	embryonic lethality, incomplete penetrance	the appearance of lower than Mendelian ratios of organisms of a given genotype due to death of some, but not all of the organisms within the embryonic period prior to organogenesis (Mus: prior to E14)
MP:0011103	embryonic lethality at implantation, incomplete penetrance	the appearance of lower than Mendelian ratios of organisms of a given genotype due to death of some, but not all of the organisms at the point of implantation (Mus: E4 5)
MP:0011104	embryonic lethality before implantation, incomplete penetrance	the appearance of lower than Mendelian ratios of organisms of a given genotype due to death of some, but not all of the organisms between fertilization and implantation (Mus: E0 to less than E4 5)
MP:0011105	embryonic lethality between implantation and placentation, incomplete penetrance	the appearance of lower than Mendelian ratios of organisms of a given genotype due to death of some, but not all of the organisms between the point of implantation and the initiation of placentation (Mus: E4 5 to less than E9)
MP:0011106	embryonic lethality between implantation and somite formation, incomplete penetrance	the appearance of lower than Mendelian ratios of organisms of a given genotype due to death of some, but not all of the organisms between the point of implantation and somite formation (Mus: E4 5 to less than E8)
MP:0011107	embryonic lethality between somite formation and embryo turning, incomplete penetrance	the appearance of lower than Mendelian ratios of organisms of a given genotype due to death of some, but not all of the organisms between somite formation and the initiation of embryo turning (Mus: E8 to less than E9)
MP:0011108	embryonic lethality during organogenesis, incomplete penetrance	the appearance of lower than Mendelian ratios of organisms of a given genotype due to death of some, but not all of the organisms between embryo turning and the completion of organogenesis (Mus: E9-9 5 to less than E14)
MP:0011109	lethality throughout fetal growth and development, incomplete penetrance	the appearance of lower than Mendelian ratios of organisms of a given genotype due to death of some, but not all of the organisms between the completion of organogenesis and birth (Mus: E14 to approximately E18 5)
MP:0011110	preweaning lethality, incomplete penetrance	the appearance of lower than Mendelian ratios of organisms of a given genotype due to death of some, but not all of the organisms between fertilization and weaning age (Mus: approximately 3-4 weeks of age)
MP:0011111	lethality during fetal growth through weaning, complete penetrance	death of all organisms of a given genotype in a population between the completion of organogenesis and weaning age (Mus: E14 to approximately 3 weeks of age)
MP:0011112	lethality during fetal growth through weaning, incomplete penetrance	the appearance of lower than Mendelian ratios of organisms of a given genotype due to death of some, but not all of the organisms between the completion of organogenesis and weaning age (Mus: E14 to approximately 3 weeks of age)
MP:0011400	lethality, complete penetrance	all individuals of a given genotype in a population die before the end of the normal lifespan but time(s) of death are unspecified
MP:0013139	moribund	in terminal decline and approaching death; lacking vitality or vigor and becoming unresponsive
MP:0013292	embryonic lethality prior to organogenesis	death prior to the completion of embryo turning (Mus: E9-9 5)
MP:0013293	embryonic lethality prior to tooth bud stage	death prior to the appearance of tooth buds (Mus: E12-E12 5)
MP:0013294	prenatal lethality prior to heart atrial septation	death prior to the completion of heart atrial septation (Mus: E14 5-15 5)
